# Supplementary material for: Two dual-emissive Zn(ii) coordination polymers with tunable photoluminescence properties
Source: Royal Society of Chemistry journal article supplement (doi:10.1039/c2ce25880c), 2012-01-01
Supplement: c2ce25880c.pdf [file c2ce25880c.pdf]

## Two dual-emissive Zn(II) coordination polymers with tunable photoluminescence properties

Shu-quan Zhang,<sup>a,b</sup> Fei-long Jiang,<sup>a</sup> Yang Bu,<sup>a,b</sup> Ming-yan Wu,<sup>a</sup> Jie Ma,<sup>a,b</sup> Xiao-chen Shan,<sup>a,b</sup> Ke-cai Xiong,<sup>a,b</sup> Mao-chun Hong<sup>\*a</sup>

<sup>a</sup>Key Laboratory of Coal to Ethylene Glycol and Its Related Technology, State Key Laboratory of Structure Chemistry, Fujian Institute of Research on the Structure of Matter, Chinese Academy of Sciences, Fuzhou, Fujian, 350002, China. Tel: +86-591-83792460. Fax: +86-591-83794946.  
E-mail: [hmc@fjirsm.ac.cn](mailto:hmc@fjirsm.ac.cn).

<sup>b</sup>Graduate School of the Chinese Academy of Sciences, Beijing, 100049, China.

## Experimental Section

All reactants were reagent grade and used as purchased without further purification. Elemental analyses for C, H, N were carried out on a German Elementary Vario EL III instrument. The FT-IR spectra were performed on a Nicolet Magna 750 FT-IR spectrometer using KBr pellets in the range of 4000-400  $\text{cm}^{-1}$ . Thermogravimetric analyses were recorded on a NETZSCH STA 449C unit at a heating rate of  $10^\circ\text{C} \cdot \text{min}^{-1}$  under nitrogen atmosphere. The power X-ray diffraction (XRD) patterns were collected by a Rigaku DMAX2500 X-ray diffractometer using Cu  $K\alpha$  radiation ( $\lambda=0.154$  nm). Fluorescent analysis of the complexes was performed on an Edinburgh Instruments FLS920 spectrofluorimeter equipped with both continuous (450 W) and pulse xenon lamps.

**Synthesis of  $[\text{Zn}_2(\text{Hcpop})_2(\text{dpe})(\text{H}_2\text{O})]_n \cdot n\text{dpe}$  (1).** A mixture of  $\text{Zn}(\text{NO}_3)_2 \cdot 6\text{H}_2\text{O}$  (0.4 mmol, 118 mg),  $\text{H}_3\text{cpop}$  (0.05 mmol, 16 mg) and 6mL  $\text{H}_2\text{O}$  was stirred for 15 minutes, then a solution of dpe (0.15 mmol, 27mg) in 6ml n-pentanol was added with stirring at room temperature. After 15 minutes, the mixture was introduced in 20mL capped vial, which was heated to  $85^\circ\text{C}$  for 72 hours. The resulting yellow rod-like crystals of **6** were filtered in 62% yield based on  $\text{H}_3\text{cpop}$ . Anal. Calcd for  $\text{C}_{54}\text{N}_4\text{O}_{15}\text{H}_{38}\text{Zn}_2$  (Mr = 1113.62): cal: C, 58.24 %; H, 3.44%; N, 5.03%. found: C, 57.87%; H, 3.52%; N, 5.12%. Selected IR data (KBr pellet,  $\text{cm}^{-1}$ ): 3650 (w), 3071 (w), 1617 (s), 1579 (s), 1504 (w), 1397 (m), 1365 (m), 1234 (m), 845 (m), 779 (w), 552 (m).

**Synthesis of  $[\text{Zn}_4(\text{cpop})_2(\text{dpe})_2(\mu\text{-OH})_2]_n \cdot n\text{dpe}$  (2).** The preparation of **2** was similar to that of **1** except that the acetonitrile was used instead of n-pentanol. After cooling to room temperature, light yellow block-shaped crystals of **2** were obtained in 77% yield based on  $\text{H}_3\text{cpop}$ . Anal. Calcd for  $\text{C}_{66}\text{N}_6\text{O}_{16}\text{H}_{46}\text{Zn}_4$  (Mr = 1440.74): cal: C, 55.02 %; H, 3.22%; N, 5.83%. found: C, 54.84%; H, 3.28%; N, 5.72%. Selected IR data (KBr pellet,  $\text{cm}^{-1}$ ): 3394 (w), 3048 (w), 1612 (s), 1590 (s), 1504 (m), 1394 (m), 1259 (m), 1230 (m), 1207 (w), 842 (m), 791 (w), 553 (m).

## Crystallographic Analyses

The intensity data were collected on a Rigaku Mercury CCD diffractometer equipped with a graphite-monochromated Mo  $K\alpha$  radiation ( $\lambda=0.71073$  Å) at room temperature. All absorption corrections were performed by using the multiscan program. The structure were solved by direct methods and refined by full-matrix least squares on  $F^2$  with the SHELXTL-97 program.<sup>1</sup> Crystallographic data for the structures reported in this paper have been deposited in the Cambridge Crystallographic Data Center with CCDC reference numbers 871847 and 834613 for complexes **1-2**.

## Thermal Gravimetric Analysis (TGA)

To examine the thermal stability of the complex **1** and **2**, the thermal gravimetric analysis (TGA) experiments were carried out in the temperature range of 30-800  $^\circ\text{C}$  under a flow of nitrogen with heating rate of  $10^\circ\text{C} \cdot \text{min}^{-1}$  (Fig. S6). A total loss of 1.72% was observed for **1** in the temperature range of 30-190  $^\circ\text{C}$ , which can be attributed to the loss of one coordinated aqua molecule (calcd

1.62%), and the decomposition of the residue was observed at about 240 °C. TGA for **2** shows no obvious weight loss between 30 and about 300°C. On further heating, the framework gradually decomposes.

### X-ray Diffractometer Analysis (XRD)

For complex **1** and **2**, the positions of diffraction peaks of the experimental are consistent with the simulated XRD patterns well, indicating the phase purity of the as-synthesized sample (Fig. S7).

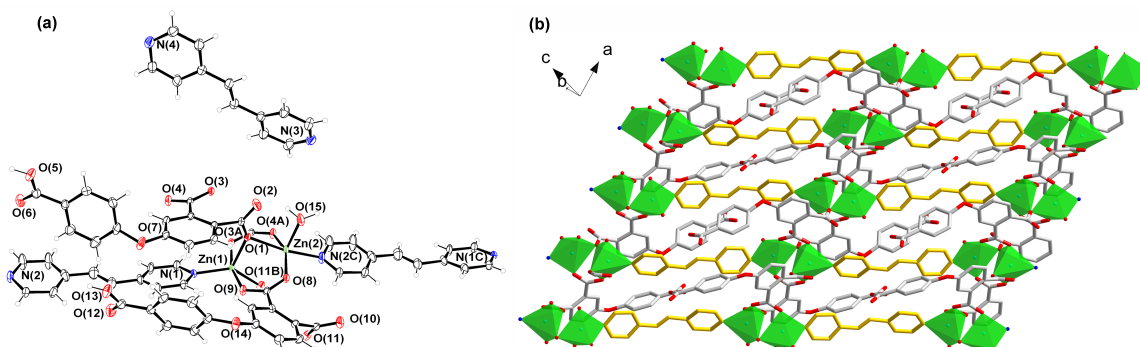

Fig. S1 (a) The coordination environment of Zn(II) atoms in complex **1**. Symmetry transformations used to generate equivalent atoms: A=  $-x, -y, 1-z$ , B=  $-x-1, y, 1-z$ , C=  $x-1, y, 1+z$ . (b) 2D (4,4)-connected network constructed from 1D chains of **1**.

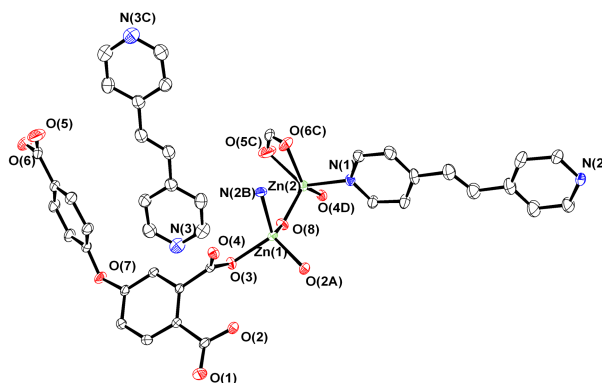

Fig. S2 The coordination environment of Zn(II) atoms in complex **2** (the hydrogen atoms are omitted for clarity). Symmetry transformations used to generate equivalent atoms: A=  $1-x, 1-y, -z$ , B=  $1+x, 3/2-y, 1/2+z$ , C=  $1-x, 1-y, 1-z$ , D=  $x-1, y, z$ .

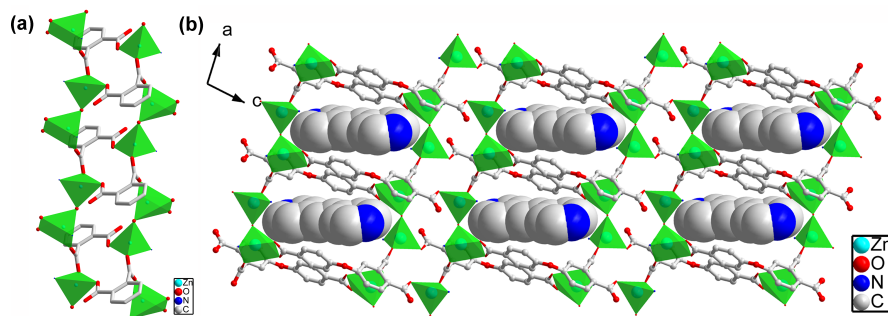

Fig. S3 (a) View of 1D double chain based on binuclear  $Zn_2$  clusters in **2**. (b) The drawing of cavities in complex **2**, the uncoordinated dpe ligands reserved in these cavities represent as space-filling mode.

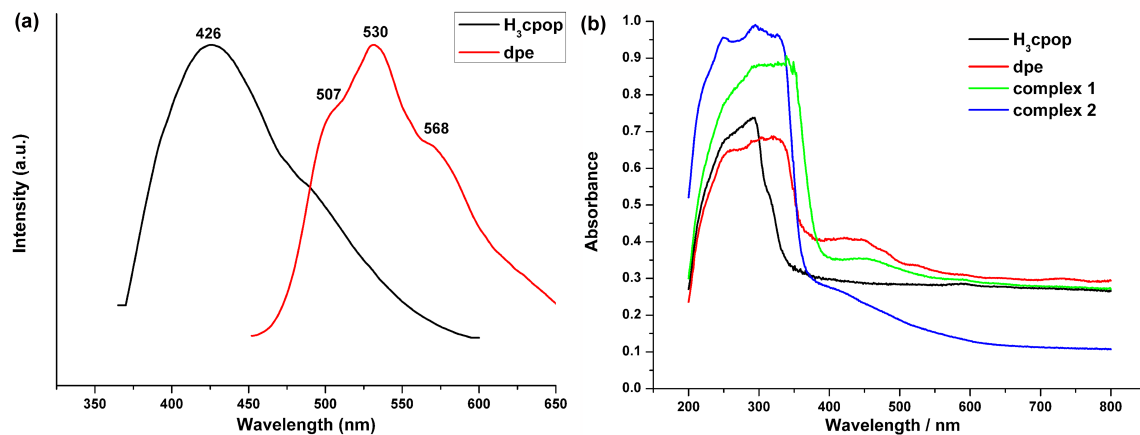

Fig. S4 (a) Normalized emission spectra of ligands  $H_3cpop$  and  $dpe$  at room temperature. (b) UV/Vis spectra of  $H_3cpop$ ,  $dpe$  and complexes **1-2** at room temperature.

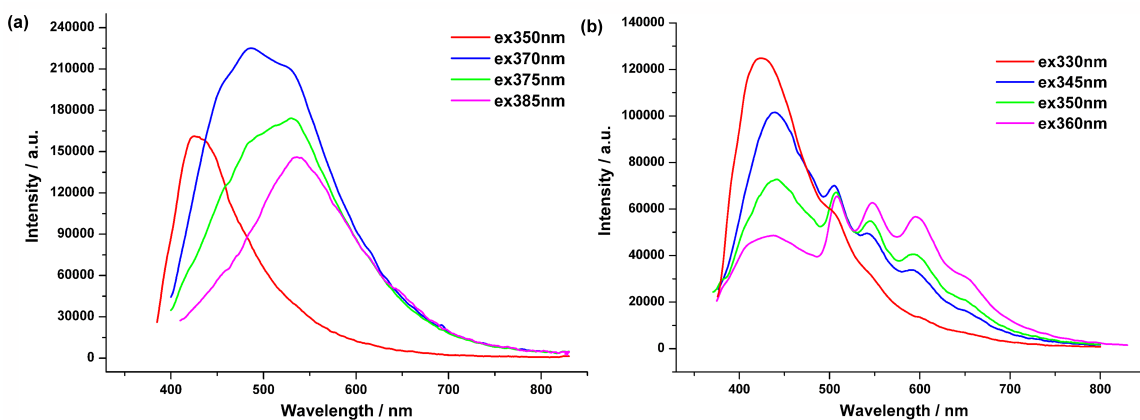

Fig. S5 Solid-state PL spectra of **1** (a) and **2** (b) by variation of excitation length under the same metrical condition at 10 K.

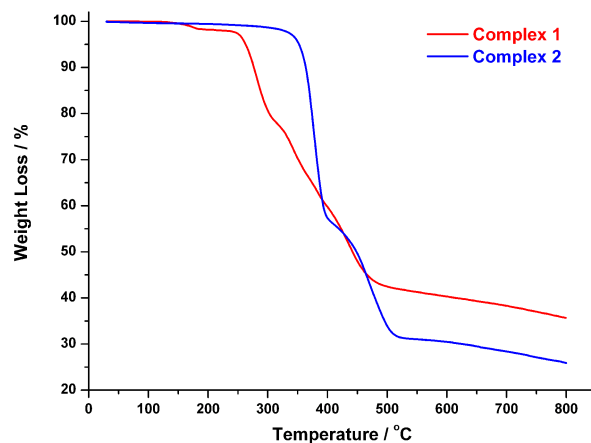

Fig. S6 TGA curves for complexes **1** and **2**

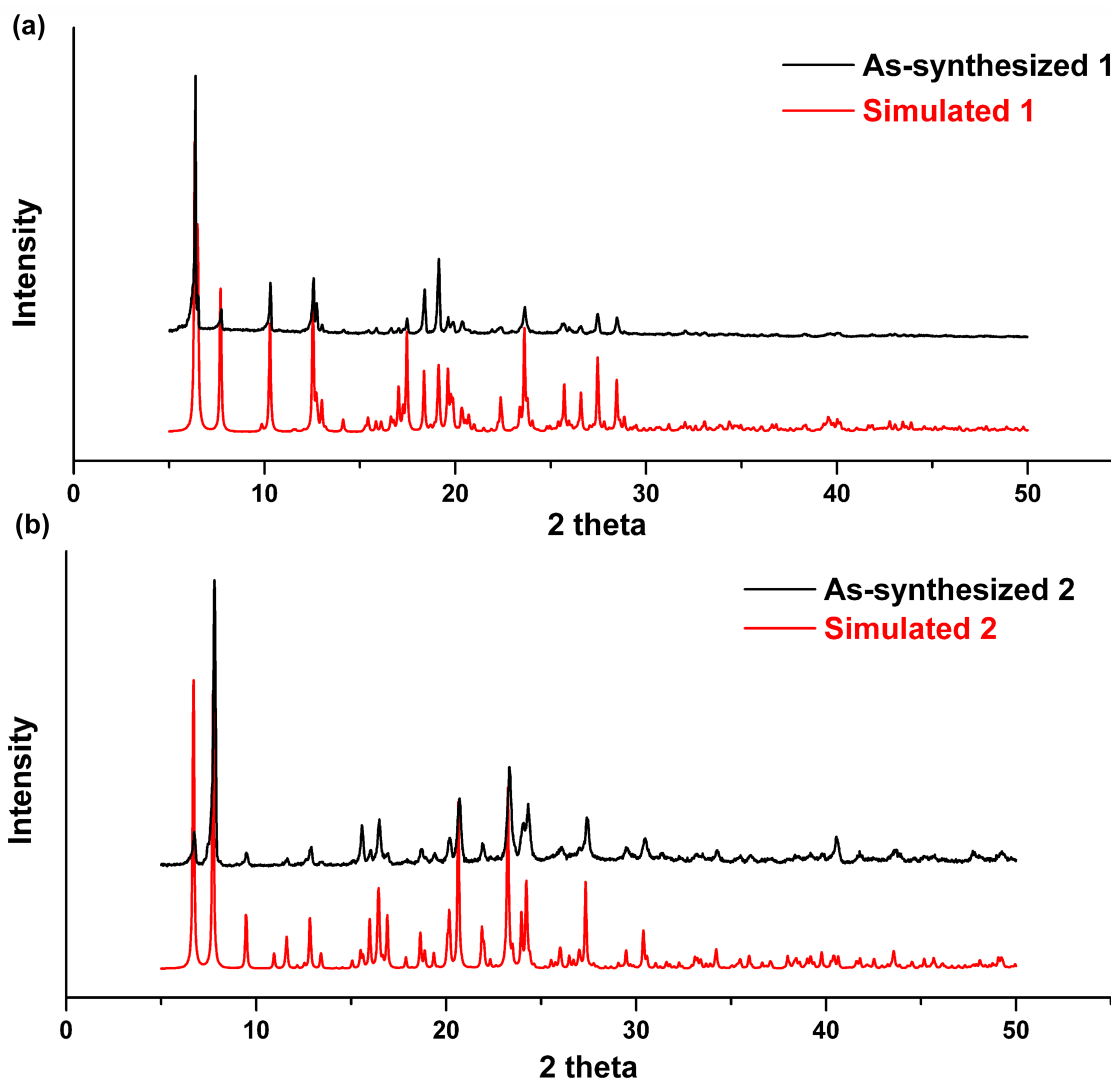

Fig. S7 Powder X-ray diffraction patterns of the simulated and as-synthesized samples of **1** and **2**.

Table S1. Selected Hydrogen-bond Lengths (Å) and Angles (°) for **1**<sup>a</sup>

|                            | <i>D</i> —H | H... <i>A</i> | <i>D</i> ... <i>A</i> | <i>D</i> —H... <i>A</i> |
|----------------------------|-------------|---------------|-----------------------|-------------------------|
| O13—H13A...N4 <sup>i</sup> | 0.92        | 1.75          | 2.593 (4)             | 152.6                   |
| O5—H5A...N3 <sup>ii</sup>  | 0.91        | 1.66          | 2.563 (4)             | 173.7                   |

<sup>a</sup>Symmetry codes: (i) 1-x, 1-y, -z; (ii) 1+x, y, -1+z.

Table S2. Luminescence Lifetimes of Complexes **1** and **2**<sup>a</sup>

| Complex <b>1</b> <sup>b</sup> |                | Complex <b>2</b> <sup>c</sup> |                |
|-------------------------------|----------------|-------------------------------|----------------|
| $\lambda_{em}/nm$             | $\tau/ns$      | $\lambda_{em}/nm$             | $\tau/ns$      |
| 450                           | 0.58/3.20/16.9 | 430                           | 0.50/2.93      |
| 540                           | 2.59/0.43/8.04 | 515                           | 0.69/3.44/11.1 |
|                               |                | 550                           | 0.84/4.11/13.9 |
|                               |                | 595                           | 1.04/2.59/14.3 |

<sup>a</sup>Measurements were performed at room temperature. <sup>b</sup>Lifetimes determined following excitation at

350 nm and 397 nm, respectively. <sup>c</sup>Lifetimes determined following excitation at 360 nm.

Table S3. Quantum yield of complexes 1 and 2 at room temperature (298K) and 10K

| Complex 1 | $\Phi_{f,ex\ 350}/\%$ | $\Phi_{f,ex\ 370}/\%$ | $\Phi_{f,ex\ 375}/\%$ | $\Phi_{f,ex\ 385}/\%$ |
|-----------|-----------------------|-----------------------|-----------------------|-----------------------|
| 298K      | 2.09                  | 2.34                  | 2.39                  | 2.60                  |
| 10K       | 6.28                  | 14.59                 | 11.14                 | 8.74                  |
| Complex 2 | $\Phi_{f,ex\ 330}/\%$ | $\Phi_{f,ex\ 345}/\%$ | $\Phi_{f,ex\ 350}/\%$ | $\Phi_{f,ex\ 360}/\%$ |
| 298K      | 2.02                  | 2.81                  | 3.25                  | 4.59                  |
| 10K       | 9.44                  | 9.72                  | 8.98                  | 8.90                  |

Table S4. Crystallographic data and structure refinement details for 1 and 2

| complexes                                                       | 1                                                                              | 2                                                                              |
|-----------------------------------------------------------------|--------------------------------------------------------------------------------|--------------------------------------------------------------------------------|
| chemical formula                                                | C <sub>54</sub> N <sub>4</sub> O <sub>15</sub> H <sub>38</sub> Zn <sub>2</sub> | C <sub>66</sub> N <sub>6</sub> O <sub>16</sub> H <sub>46</sub> Zn <sub>4</sub> |
| formula weight                                                  | 1113.62                                                                        | 1440.64                                                                        |
| crystal system                                                  | Triclinic                                                                      | Monoclinic                                                                     |
| space group                                                     | <i>P</i> -1                                                                    | <i>P</i> 2 <sub>1</sub> / <i>c</i>                                             |
| <i>a</i> (Å)                                                    | 11.697(2)                                                                      | 7.778(2)                                                                       |
| <i>b</i> (Å)                                                    | 14.521(3)                                                                      | 22.865(7)                                                                      |
| <i>c</i> (Å)                                                    | 14.760(3)                                                                      | 16.384(5)                                                                      |
| $\alpha$ (°)                                                    | 73.646(4)                                                                      | 90.00                                                                          |
| $\beta$ (°)                                                     | 73.937(5)                                                                      | 99.471(5)                                                                      |
| $\gamma$ (°)                                                    | 87.731(7)                                                                      | 90.00                                                                          |
| <i>V</i> (Å <sup>3</sup> )                                      | 2309.7(8)                                                                      | 2876(2)                                                                        |
| <i>Z</i>                                                        | 2                                                                              | 4                                                                              |
| <i>T</i> K                                                      | 298(2)                                                                         | 298(2)                                                                         |
| <i>D</i> <sub><i>C</i></sub> (g cm <sup>-3</sup> )              | 1.601                                                                          | 1.665                                                                          |
| $\mu$ (mm <sup>-1</sup> )                                       | 1.12                                                                           | 1.73                                                                           |
| <i>F</i> (000)                                                  | 1140                                                                           | 1464                                                                           |
| $\theta$ range (°)                                              | 2.0–25.0                                                                       | 2.2–27.5                                                                       |
| Collected reflections                                           | 7862                                                                           | 6562                                                                           |
| unique reflections                                              | 5471                                                                           | 5846                                                                           |
| parameters                                                      | 676                                                                            | 415                                                                            |
| Gof on <i>F</i> <sup>2</sup>                                    | 0.935                                                                          | 1.014                                                                          |
| <i>R</i> <sub>1</sub> <sup>a</sup> ( <i>I</i> > 2σ( <i>I</i> )) | 0.0450                                                                         | 0.0393                                                                         |

| $wR_2^b$ (all data)                                                                                                       | 0.1000      | 0.1131                                  |             |
|---------------------------------------------------------------------------------------------------------------------------|-------------|-----------------------------------------|-------------|
| $^a R_1 = \frac{\sum   F_0  -  F_c  }{\sum  F_0 }$ . $^b wR_2 = \frac{[\sum w(F_o^2 - F_c^2)^2]}{\sum w(F_o)^2}]^{1/2}$ . |             |                                         |             |
| Table S5. Selected Bond Lengths (Å) and Bond Angles (°) for <b>1</b> and <b>2</b>                                         |             |                                         |             |
| <b>1</b>                                                                                                                  |             |                                         |             |
| Zn1—O11 <sup>i</sup>                                                                                                      | 2.001 (2)   | Zn2—O4 <sup>ii</sup>                    | 2.002 (2)   |
| Zn1—N1                                                                                                                    | 2.002 (2)   | Zn2—O8                                  | 2.013 (2)   |
| Zn1—O1                                                                                                                    | 2.066 (2)   | Zn2—O15                                 | 2.056 (3)   |
| Zn1—O9                                                                                                                    | 2.095 (2)   | Zn2—N2 <sup>iii</sup>                   | 2.073 (3)   |
| Zn1—O3 <sup>ii</sup>                                                                                                      | 2.100 (2)   | Zn2—O1                                  | 2.263 (2)   |
| O11 <sup>i</sup> —Zn1—N1                                                                                                  | 137.65 (11) | O4 <sup>ii</sup> —Zn2—O8                | 155.48 (9)  |
| O11 <sup>i</sup> —Zn1—O1                                                                                                  | 107.25 (9)  | O4 <sup>ii</sup> —Zn2—O15               | 103.14 (11) |
| N1—Zn1—O1                                                                                                                 | 114.92 (10) | O8—Zn2—O15                              | 97.78 (11)  |
| O11 <sup>i</sup> —Zn1—O9                                                                                                  | 85.09 (9)   | O4 <sup>ii</sup> —Zn2—N2 <sup>iii</sup> | 93.66 (10)  |
| N1—Zn1—O9                                                                                                                 | 95.06 (10)  | O8—Zn2—N2 <sup>iii</sup>                | 98.73 (10)  |
| O1—Zn1—O9                                                                                                                 | 84.20 (9)   | O15—Zn2—N2 <sup>iii</sup>               | 90.85 (12)  |
| O11 <sup>i</sup> —Zn1—O3 <sup>ii</sup>                                                                                    | 87.28 (9)   | O4 <sup>ii</sup> —Zn2—O1                | 83.63 (8)   |
| N1—Zn1—O3 <sup>ii</sup>                                                                                                   | 100.75 (9)  | O8—Zn2—O1                               | 86.47 (8)   |
| O1—Zn1—O3 <sup>ii</sup>                                                                                                   | 83.65 (9)   | O15—Zn2—O1                              | 82.78 (9)   |
| O9—Zn1—O3 <sup>ii</sup>                                                                                                   | 163.06 (8)  | N2 <sup>iii</sup> —Zn2—O1               | 172.30 (11) |
| Symmetry codes: (i) -1-x, -y, 1-z (ii) -x, -y, 1-z (iii) -1+x, y, 1+z                                                     |             |                                         |             |
| <b>2</b>                                                                                                                  |             |                                         |             |
| Zn1—O8                                                                                                                    | 1.9508 (18) | Zn2—O8                                  | 1.9265 (17) |
| Zn1—O2 <sup>i</sup>                                                                                                       | 1.9738 (18) | Zn2—O4 <sup>iii</sup>                   | 1.9982 (17) |
| Zn1—O3                                                                                                                    | 2.0173 (17) | Zn2—O6 <sup>iv</sup>                    | 2.101 (3)   |
| Zn1—N2 <sup>ii</sup>                                                                                                      | 2.052 (2)   | Zn2—O5 <sup>iv</sup>                    | 2.300 (3)   |
| N1—Zn2                                                                                                                    | 2.057 (2)   | O8—Zn2—O6 <sup>iv</sup>                 | 109.74 (10) |
| O8—Zn1—O2 <sup>i</sup>                                                                                                    | 115.78 (8)  | O4 <sup>iii</sup> —Zn2—O6 <sup>iv</sup> | 137.00 (10) |
| O8—Zn1—O3                                                                                                                 | 97.82 (8)   | N1—Zn2—O6 <sup>iv</sup>                 | 92.87 (10)  |
| O2 <sup>i</sup> —Zn1—O3                                                                                                   | 103.96 (8)  | O8—Zn2—O5 <sup>iv</sup>                 | 111.44 (9)  |

|                                       |            |                                         |             |
|---------------------------------------|------------|-----------------------------------------|-------------|
| O8—Zn1—N2 <sup>ii</sup>               | 107.96 (8) | O4 <sup>iii</sup> —Zn2—O5 <sup>iv</sup> | 90.26 (9)   |
| O2 <sup>i</sup> —Zn1—N2 <sup>ii</sup> | 118.40 (9) | N1—Zn2—O5 <sup>iv</sup>                 | 133.89 (10) |
| O3—Zn1—N2 <sup>ii</sup>               | 110.82 (8) | O6 <sup>iv</sup> —Zn2—O5 <sup>iv</sup>  | 58.71 (11)  |
| O8—Zn2—O4 <sup>iii</sup>              | 109.13 (8) | O8—Zn2—O6 <sup>iv</sup>                 | 109.74 (10) |
| O8—Zn2—N1                             | 112.26 (8) | O4 <sup>iii</sup> —Zn2—O6 <sup>iv</sup> | 137.00 (10) |
| O4 <sup>iii</sup> —Zn2—N1             | 88.95 (8)  |                                         |             |

Symmetry codes: (i) 1-x, 1-y, -z (ii) 1+x, 3/2-y, 1/2+z, (iii) -1+x, y, z, (iv) 1-x, 1-y, 1-z, (v) -1+x, 3/2-y, -1/2+z, (vi) 1+x, y, z

Table S6. List of  $\pi$ - $\pi$  interactions in complexes **1** and **2**<sup>a</sup>.

| Complex <b>1</b>                        |                 |           |                                         |             |             |
|-----------------------------------------|-----------------|-----------|-----------------------------------------|-------------|-------------|
| Ring A                                  | Ring B          | Cg-Cg (Å) | Dihedral angle (°)                      | CgA_Perp(Å) | Slippage(Å) |
| R1                                      | R2              | 3.8306    | 10.02                                   | 3.552       | 1.434       |
| R3                                      | R3 <sup>i</sup> | 3.8684    | 0.00                                    | 3.591       | 1.439       |
| R1 = N(1)-C(33)-C(32)-C(31)-C(35)-C(34) |                 |           | R2 = C(1)-C(2)-C(3)-C(4)-C(5)-C(6)      |             |             |
| R3 = N(3)-C(45)-C(44)-C(43)-C(47)-C(46) |                 |           |                                         |             |             |
| Symmetry codes: (i) -x, 1-y, 1-z.       |                 |           |                                         |             |             |
| Complex <b>2</b>                        |                 |           |                                         |             |             |
| Ring A                                  | Ring B          | Cg-Cg (Å) | Dihedral angle (°)                      | CgA_Perp(Å) | Slippage(Å) |
| R1                                      | R2 <sup>i</sup> | 4.3922    | 8.58                                    | 3.981       | 1.856       |
| R1 = N(1)-C(18)-C(17)-C(16)-C(20)-C(19) |                 |           | R2 = N(2)-C(25)-C(24)-C(23)-C(27)-C(26) |             |             |
| Symmetry codes: (i) x, 1/2-y, -1/2+z.   |                 |           |                                         |             |             |

<sup>a</sup>Cg-Cg = Distance between ring Centroids, CgA\_Perp = Perpendicular distance of Cg(A) on ring B, Slippage = Distance between Cg(A) and Perpendicular Projection of Cg(B) on Ring A.

## Reference

1 G. M. Sheldrick, SHELXS-97, Programs for X-ray Crystal Structure Solution; University of Göttingen: Germany, 1997.
